# Supplementary material
Source: ML conference proceedings conference paper supplement (https://aclanthology.org/D19-1294)
Supplement: Attachment [file _Supp__Evaluating_Pronominal_Anaphora_in_Machine_Translation__An_Evaluation_Framework_and_a_Test_Suite.pdf › _Supp__Evaluating_Pronominal_Anaphora_in_Machine_Translation__An_Evaluation_Framework_and_a_Test_Suite.pdf]

# Evaluating Pronominal Anaphora in Machine Translation: An Evaluation Measure and a Test Suite

Prathyusha Jwalapuram\*, Shafiq Joty\*<sup>§</sup>, Irina Temnikova<sup>†</sup>, and Preslav Nakov<sup>‡</sup>

\*Nanyang Technological University, Singapore

<sup>§</sup>Salesforce Research Asia, Singapore

<sup>†</sup>Sofia University, Bulgaria

<sup>‡</sup>Qatar Computing Research Institute, Doha, Qatar

\*{jwal0001, srjoty}@ntu.edu.sg

<sup>†</sup>irina.temnikova@gmail.com

<sup>‡</sup>pnakov@hbku.edu.qa

## 1 Appendix

| Reference Pronoun | System Translation | Reference Pronoun | System Translation |
|-------------------|--------------------|-------------------|--------------------|
| which             | it                 | they              | these              |
| which             | these              | this              | which              |
| which             | that               | her               | i                  |
| he                | his                | he                | him                |
| us                | we                 | we                | our                |
| it                | you                | i                 | you                |
| that              | them               | their             | its                |
| your              | you                | that              | their              |
| his               | he                 | it                | which              |
| she               | her                | us                | our                |
| his               | its                | i                 | my                 |
| his               | their              | his               | who                |
| me                | i                  | their             | them               |
| that              | it                 | they              | you                |
| these             | that               | they              | them               |
| these             | this               | we                | that               |
| our               | their              | his               | him                |
| their             | they               | me                | my                 |
| it                | she                | its               | it                 |
| she               | he                 | it                | what               |
| their             | his                | her               | yourself           |
| her               | that               | her               | she                |
| you               | what               | i                 | it                 |
| those             | that               | who               | they               |
| which             | this               | himself           | he                 |
| him               | he                 | my                | i                  |
| they              | their              | they              | that               |
| our               | we                 | it                | its                |
| this              | you                | her               | their              |
| who               | their              | us                | this               |
| her               | his                | her               | who                |
| that              | they               | she               | who                |
| it                | he                 | she               | you                |
|                   |                    | she               | that               |
|                   |                    | these             | them               |

| Reference Pronoun | System Translation |
|-------------------|--------------------|
| that              | what               |
| they              | i                  |
| she               | this               |
| her               | you                |
| i                 | that               |
| they              | which              |
| i                 | we                 |
| their             | your               |
| what              | it                 |
| my                | me                 |
| we                | this               |
| them              | his                |
| that              | i                  |
| that              | you                |
| they              | this               |
| he                | who                |
| i                 | they               |
| that              | his                |
| him               | that               |
| she               | your               |
| his               | my                 |
| he                | it                 |
| his               | her                |
| who               | which              |
| she               | it                 |
| your              | its                |
| his               | it                 |
| that              | he                 |
| it                | him                |
| he                | which              |
| her               | its                |
| your              | his                |
| you               | it                 |
| that              | us                 |
| my                | his                |
| its               | her                |
| it                | these              |
| he                | that               |
| you               | we                 |
| him               | it                 |
| its               | his                |
| i                 | me                 |
| what              | they               |
| it                | we                 |
| whom              | which              |
| i                 | he                 |

| Reference Pronoun | System Translation |
|-------------------|--------------------|
| whose             | which              |
| them              | they               |
| we                | us                 |
| his               | your               |
| what              | which              |
| her               | it                 |
| he                | i                  |
| those             | which              |
| it                | that               |
| we                | it                 |
| they              | themselves         |
| i                 | myself             |
| their             | he                 |
| herself           | she                |
| these             | who                |
| yourself          | you                |
| they              | it                 |
| this              | these              |
| he                | we                 |
| themselves        | itself             |
| who               | those              |
| you               | your               |
| myself            | i                  |
| herself           | itself             |
| myself            | me                 |
| those             | who                |
| himself           | his                |
| that              | this               |
| you               | that               |
| them              | their              |
| it                | they               |
| which             | we                 |
| what              | that               |
| this              | we                 |
| it                | i                  |
| your              | it                 |
| your              | yourself           |
| they              | we                 |
| you               | they               |
| her               | him                |
| you               | yourself           |
| herself           | it                 |
| you               | he                 |
| which             | they               |
